# Supplementary material for: Directing osteogenic differentiation of BMSCs by cell-secreted decellularized extracellular matrixes from different cell types
Source: Royal Society of Chemistry journal article supplement (doi:10.1039/c8tb01785a), 2018-01-01
Supplement: c8tb01785a1.pdf [file c8tb01785a1.pdf]

## Supplementary

### Directing osteogenic differentiation of BMSCs by cell-secreted decellularized extracellular matrixes from different cell origins

Chen-Yuan Gao,<sup>†a</sup> Zhao-Hui Huang,<sup>†a</sup> Wei Jing,<sup>a</sup> Peng-Fei Wei,<sup>a</sup> Le Jin,<sup>a</sup> Xue-Hui Zhang,<sup>\*b</sup>  
Qing Cai,<sup>\*a</sup> Xu-Liang Deng<sup>c</sup> and Xiao-Ping Yang<sup>a</sup>

<sup>a</sup> State Key Laboratory of Organic-Inorganic Composites; Beijing Laboratory of Biomedical Materials; Beijing University of Chemical Technology, Beijing 100029, P.R. China.

<sup>b</sup> Department of Dental Materials, Peking University School and Hospital of Stomatology, Beijing 100081, P. R. China

<sup>c</sup> Department of Geriatric Dentistry, Peking University School and Hospital of Stomatology, Beijing 100081, P. R. China

<sup>†</sup> These two authors contributed equally to this study.

\* Corresponding to:

Prof. Qing Cai, Tel & Fax: (86)-10-64412084; E-mail: [caiqing@mail.buct.edu.cn](mailto:caiqing@mail.buct.edu.cn) (Q.Cai)

Dr. Xuehui Zhang, Tel & Fax: (86)-10-82195748; E-mail: [zhangxuehui@bjmu.edu.cn](mailto:zhangxuehui@bjmu.edu.cn) (X.H.Zhang)

**Table S1** Primer sequences used for the RT-qPCR analysis in the present study.

| Gene symbol | Primer sequences (5'-3')                             |
|-------------|------------------------------------------------------|
| Runx2       | F: GCACCCAGCCCATAATAGA<br>R: TTGGAGCAAGGAGAACCC      |
| BMP2        | F: GGAAACTTCCCGACGCTTCT<br>R: CCTGCATTTGTTCCCGAAA    |
| OPN         | F: GAGGAAACCAGCCAAGGTAAG<br>R: AAAGCAAATCACTGCCAATC  |
| ALP         | F: AACGTGGCCAAGAACATCATCA<br>R: TGTCCATCTCCAGCCGTGTC |
| Col-I       | F: GCCTCCCAGAACATCACCTA<br>R: GCAGGGACTTCTTGAGGTTG   |
| 18S-rRNA    | F: GTAACCCGTTGAACCCCAT<br>R: CCATCCAATCGGTAGTAGCG    |

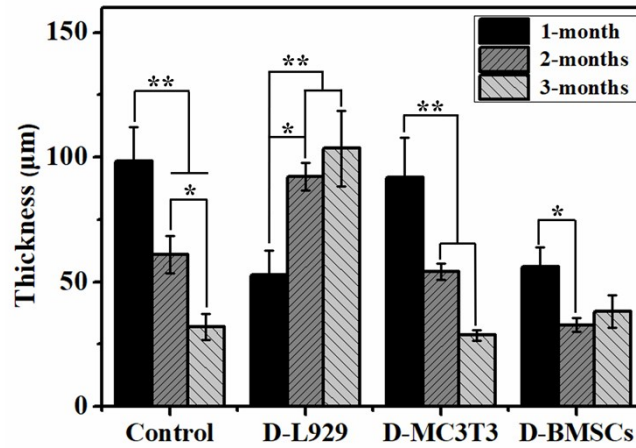

**Fig. S1** Quantitative analysis on the thickness of middle layers where fibroblasts having infiltrated into alongside with post-implantation time basing on HE stained images shown in Fig.10. Significant \* $p < 0.05$ ; highly significant \*\* $p < 0.01$ .

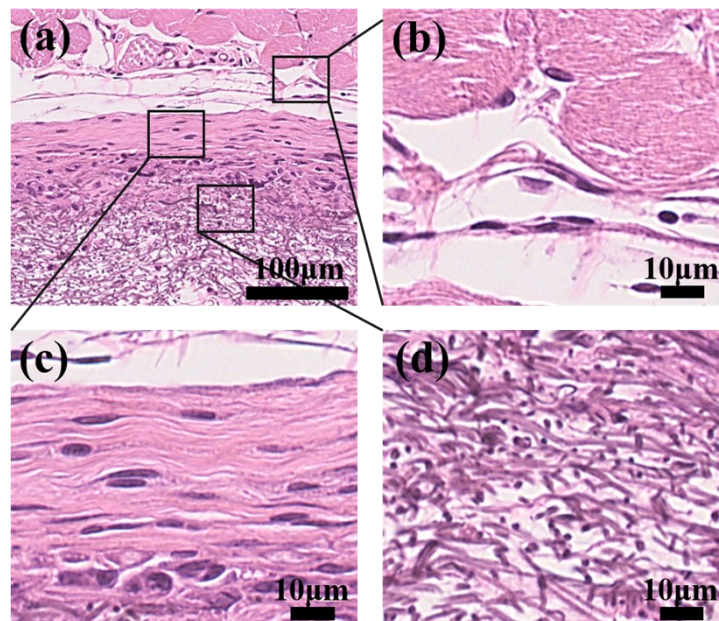

**Fig. S2** Histological analysis by H&E staining for the control group at 1 month post-implantation with higher magnifications to show details for the upper, middle and lower parts of the implantation area. (a) Overall view; (b) Upper part, the area under the muscle tissue; (c) Middle part, where the fibroblasts infiltrating area; (d) Lower part, where the fibrous mesh locating.

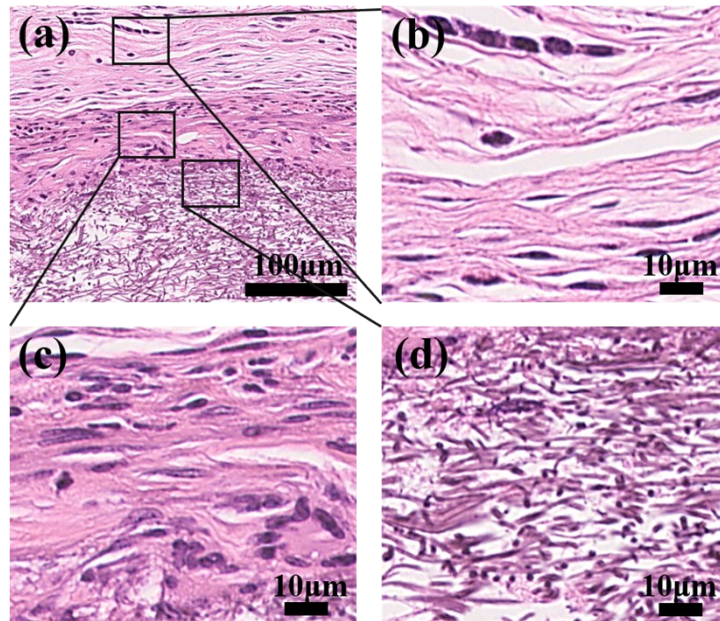

**Fig. S3** Histological analysis by H&E staining for the D-L929 group at 1 month post-implantation with higher magnifications to show details for the upper, middle and lower parts of the implantation area. (a) Overall view; (b) Upper part, the area under the muscle tissue; (c) Middle part, where the fibroblasts infiltrating area; (d) Lower part, where the fibrous mesh locating.

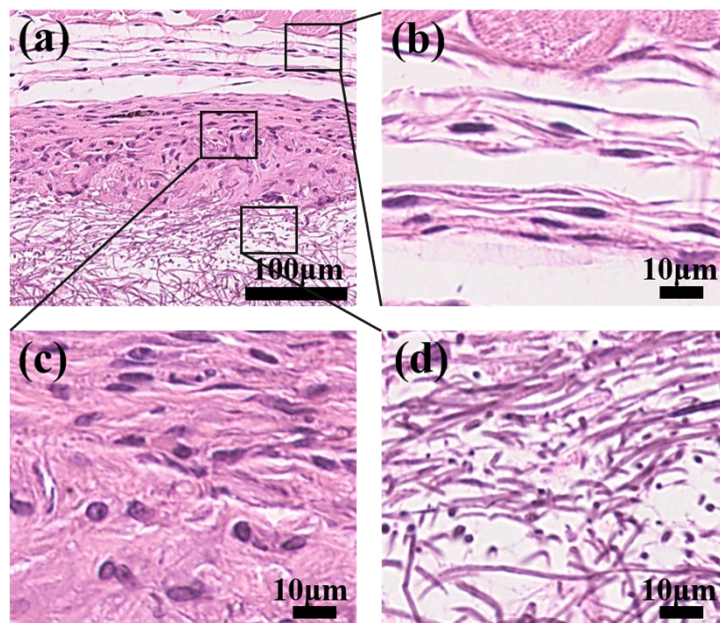

**Fig. S4** Histological analysis by H&E staining for the D-MC3T3 group at 1 month post-implantation with higher magnifications to show details for the upper, middle and lower parts of the implantation area. (a) Overall view; (b) Upper part, the area under the muscle tissue; (c) Middle part, where the fibroblasts infiltrating area; (d) Lower part, where the fibrous mesh locating.

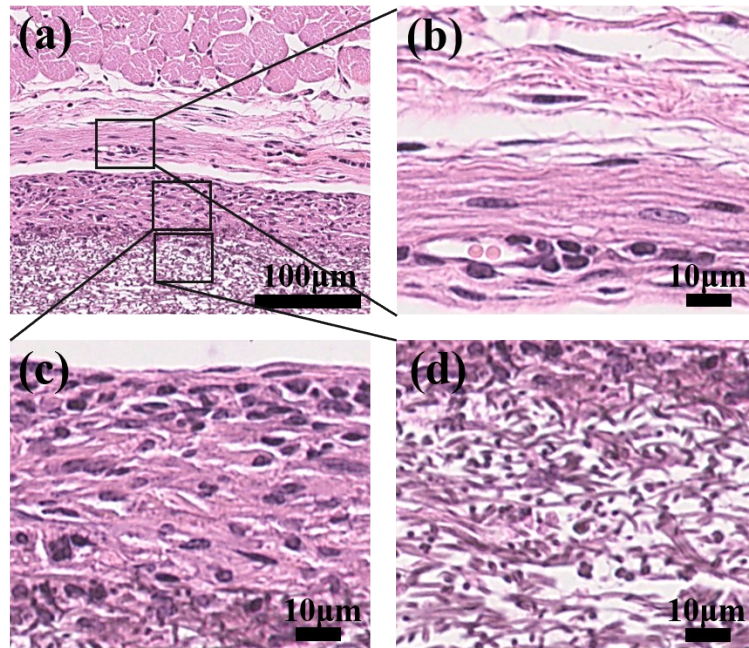

**Fig. S5** Histological analysis by H&E staining for the D-BMSCs group at 1-month post-implantation with higher magnifications to show details for the upper, middle and lower parts of the implantation area. (a) Overall view; (b) Upper part, the area under the muscle tissue; (c) Middle part, where the fibroblasts infiltrating area; (d) Lower part, where the fibrous mesh locating.

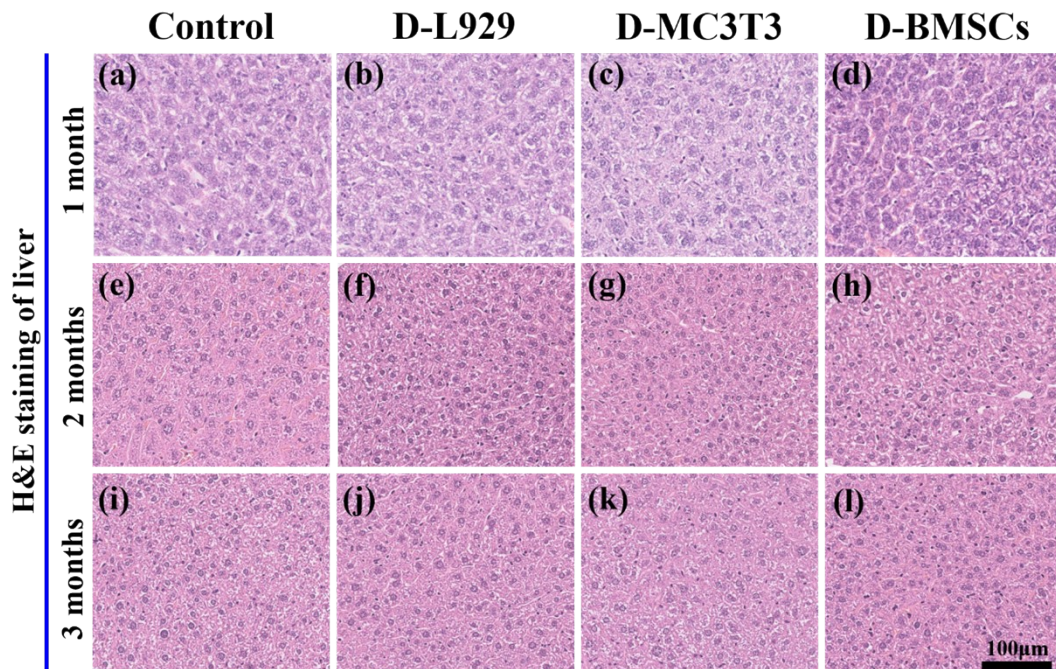

**Fig. S6** H&E staining of liver histological sections for all the experimental groups at 1, 2 and 3 months post-implantation.

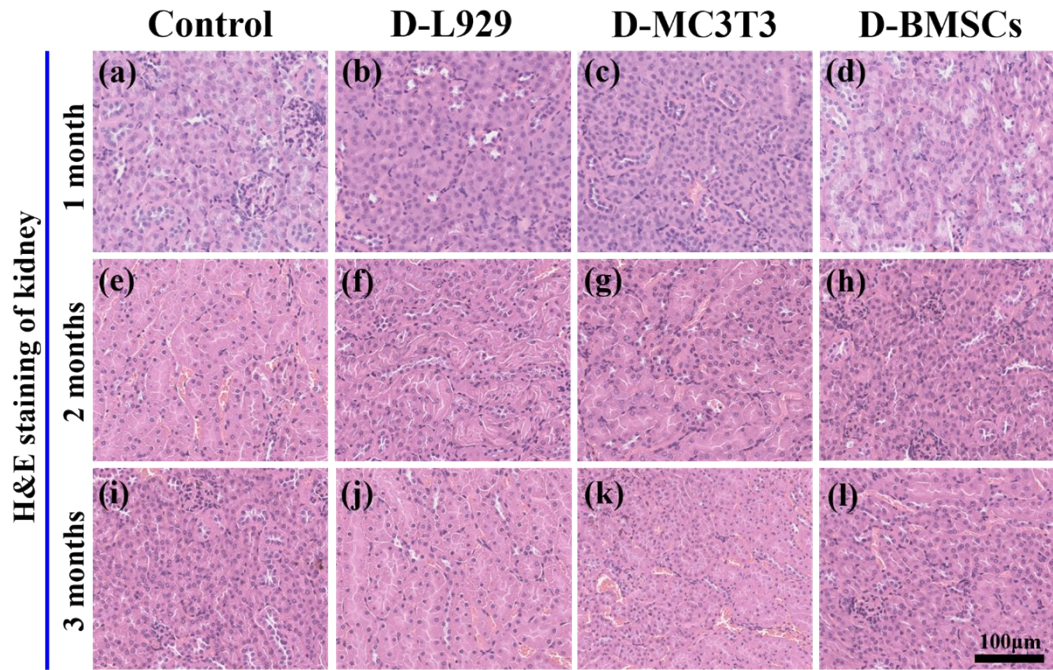

**Fig. S7** H&E staining of kidney histological sections for all the experimental groups at 1, 2 and 3 months post-implantation.
